# Supplementary material for: Expression of Mesenchymal and α-Cell Phenotypic Markers in Islet β-Cells in Recently Diagnosed Diabetes
Source: Oxford University Press journal article supplement (doi:10.2337/dc13-0705), 2013-09-24

SUPPLEMENTARY DATA

**Supplementary Figure 1.** Pancreatic phenotypic analysis: Patient 2. A representative series of immunohistochemical results from Patient 2 evidencing equivalent mixed phenotypes to Patient 1. Intra-islet beta-cells co-expressing the mesenchymal marker vimentin (A-C). The highlighted area in panel A indicates the region that is magnified in panels B and C. Arrowheads indicate cells expressing both insulin (B) and vimentin (C). Intra-islet beta-cells co-expressing the alpha-cell marker glucagon (D-F). Intra-islet cells co-expressing glucagon and vimentin (G-I).

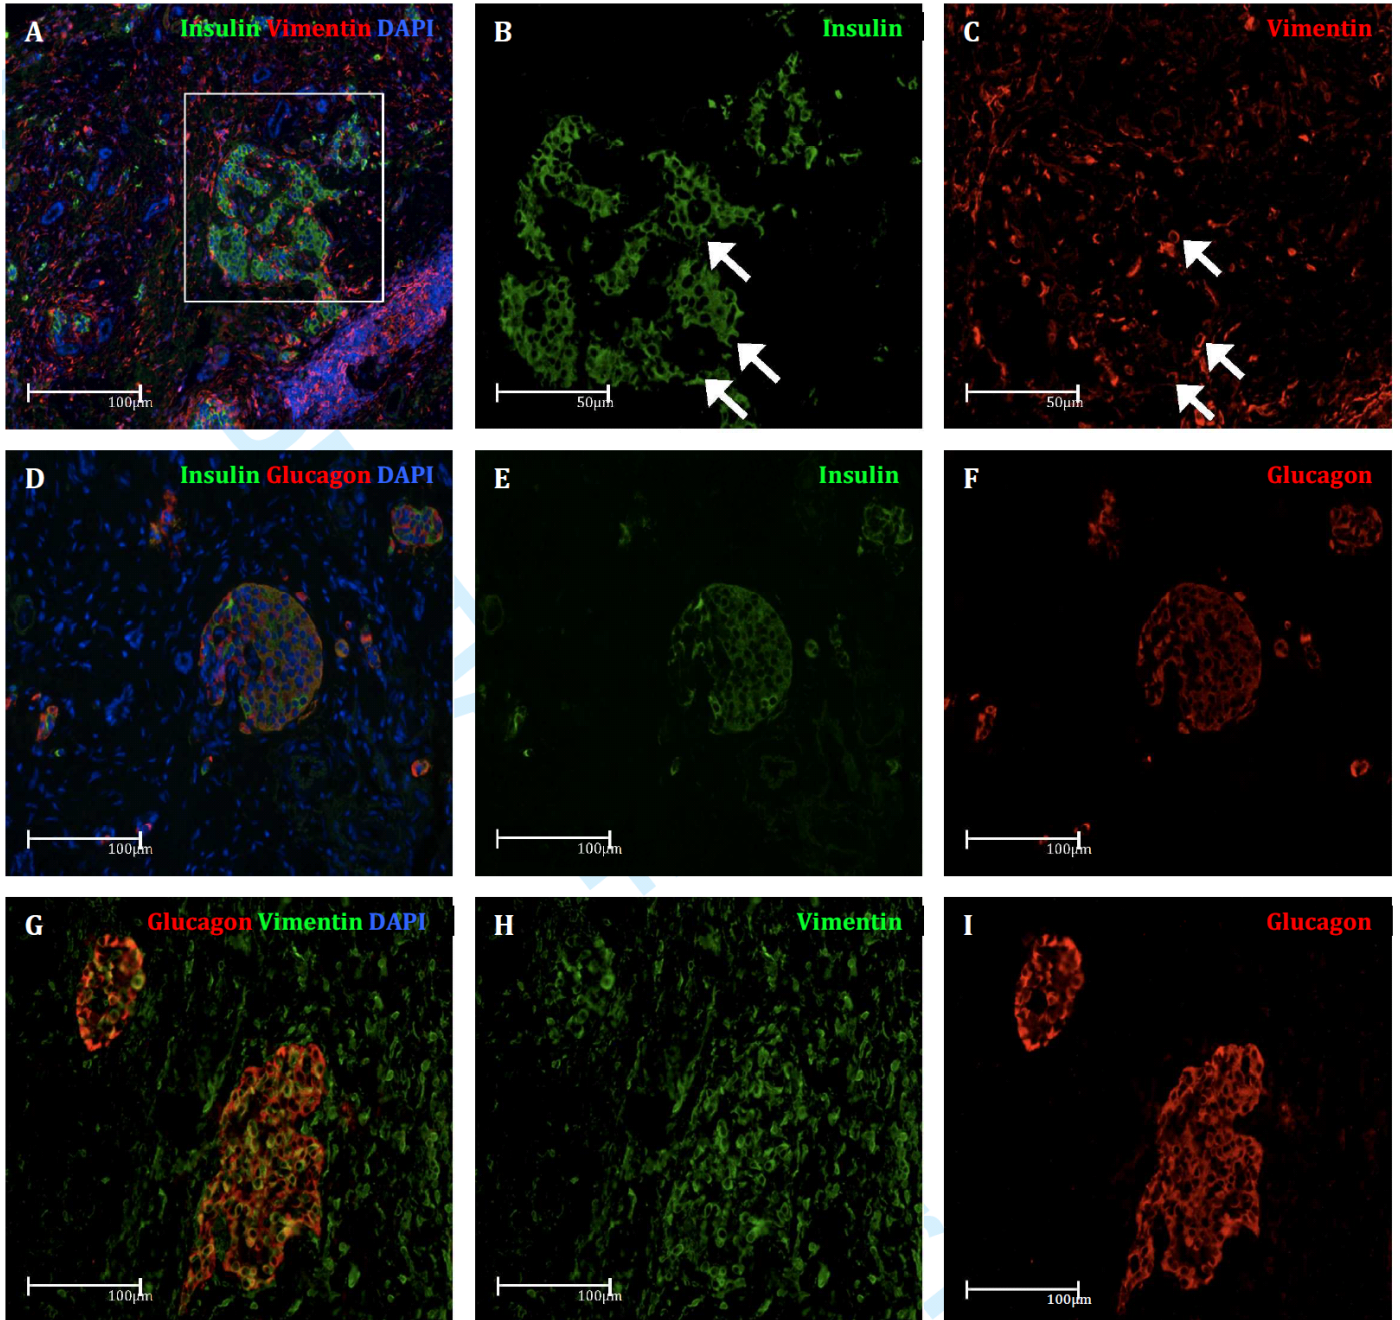

SUPPLEMENTARY DATA

**Supplementary Figure 2.** Phenotypic analysis of isolated islets: Patient 3 and non-diabetic control. Representative images from Patient 3 demonstrate equivalent mixed phenotypes to Patients 1 and 2 in isolated islets embedded in agar prior to paraffin-embedding. Single beta-cell within the islet co-expressing vimentin indicated by the arrowhead (A-C). Expression of glucagon within islet insulin-positive cells (D-F). Arrowheads indicate dual hormone-expressing cells. Co-expression of glucagon and vimentin within single cells in isolated islets marked with arrowhead (G-I). Absence of mixed phenotypes in co-staining studies in non-diabetic islets (J-I).

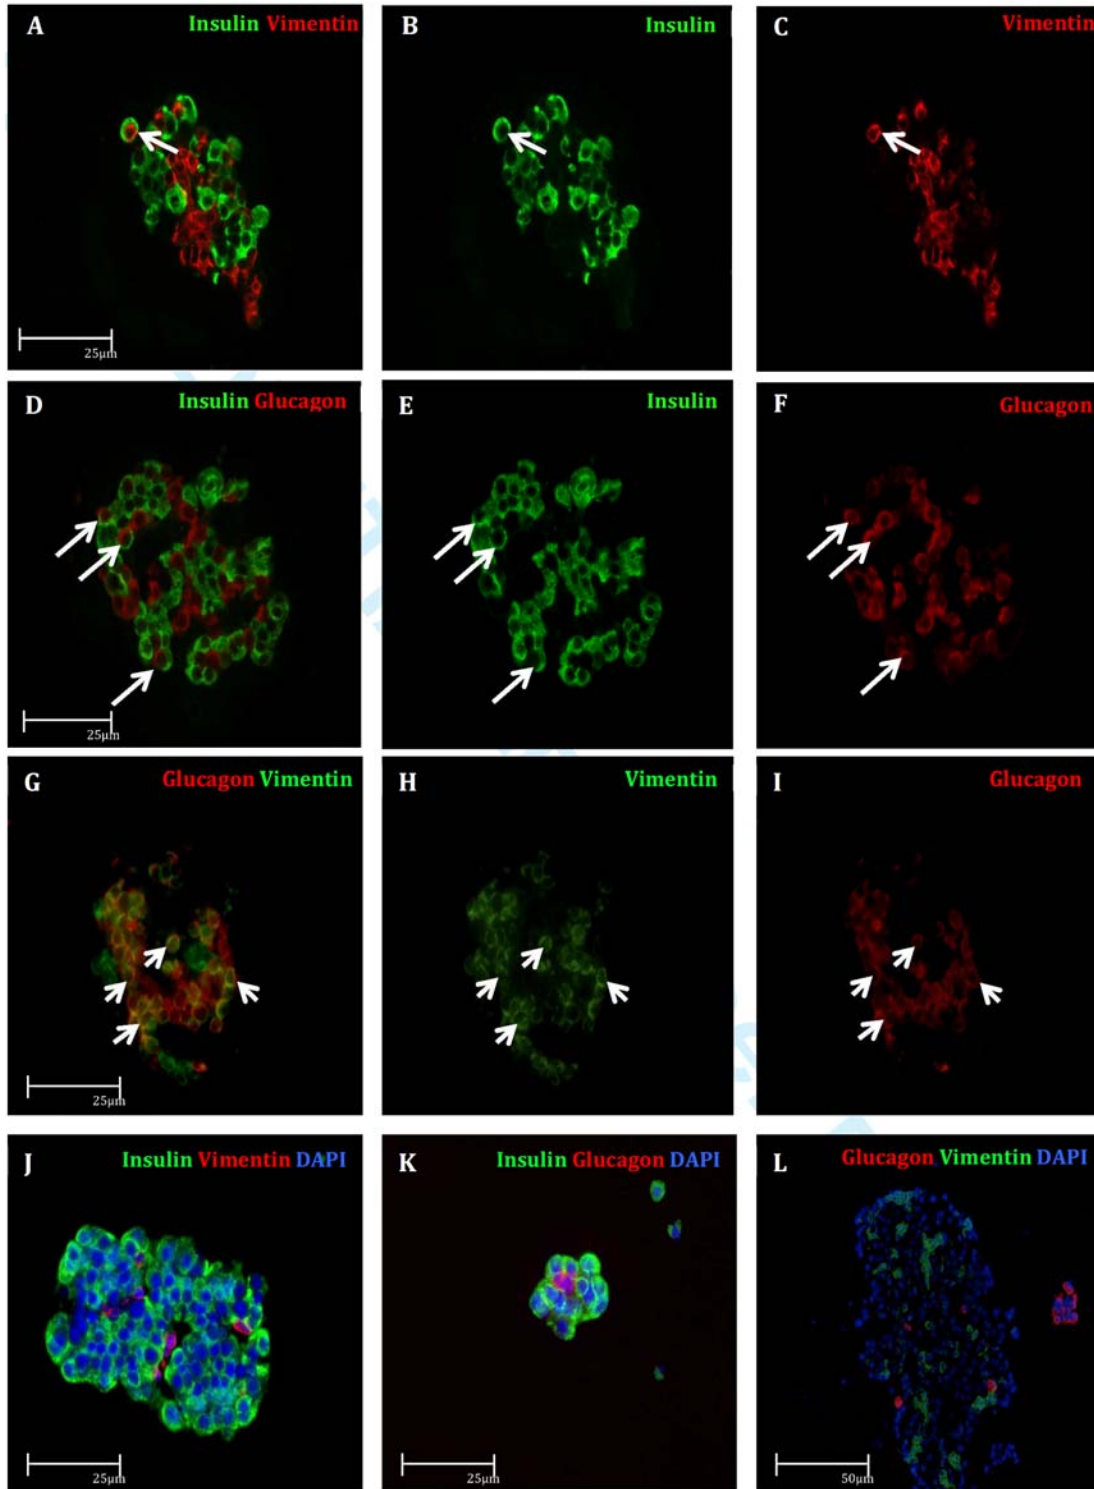

Supplement: dc130705supplementarydata.pdf [file dc130705supplementarydata.pdf]
